# Supplementary material for: NET formation is a default epigenetic program controlled by PAD4 in apoptotic neutrophils
Source: PubMed Central journal article supplement — Sci Adv. 2023 Dec 20;9(51):eadj1397. doi: 10.1126/sciadv.adj1397 (PMC10732518; doi:10.1126/sciadv.adj1397), 2023-12-20
Supplement: sciadv.adj1397_sm.pdf [file sciadv.adj1397_sm.pdf]

Supplementary Materials for

**NET formation is a default epigenetic program controlled by PAD4 in apoptotic neutrophils**

Yanfang Peipei Zhu *et al.*

Corresponding author: Ben A. Croker, [bcroker@health.ucsd.edu](mailto:bcroker@health.ucsd.edu); Yanfang Peipei Zhu, [pzhu@augusta.edu](mailto:pzhu@augusta.edu)

*Sci. Adv.* **9**, eadj1397 (2023)  
DOI: 10.1126/sciadv.adj1397

**The PDF file includes:**

Fig. S1  
Tables S1 to S5  
Legend for movie S1

**Other Supplementary Material for this manuscript includes the following:**

Movie S1

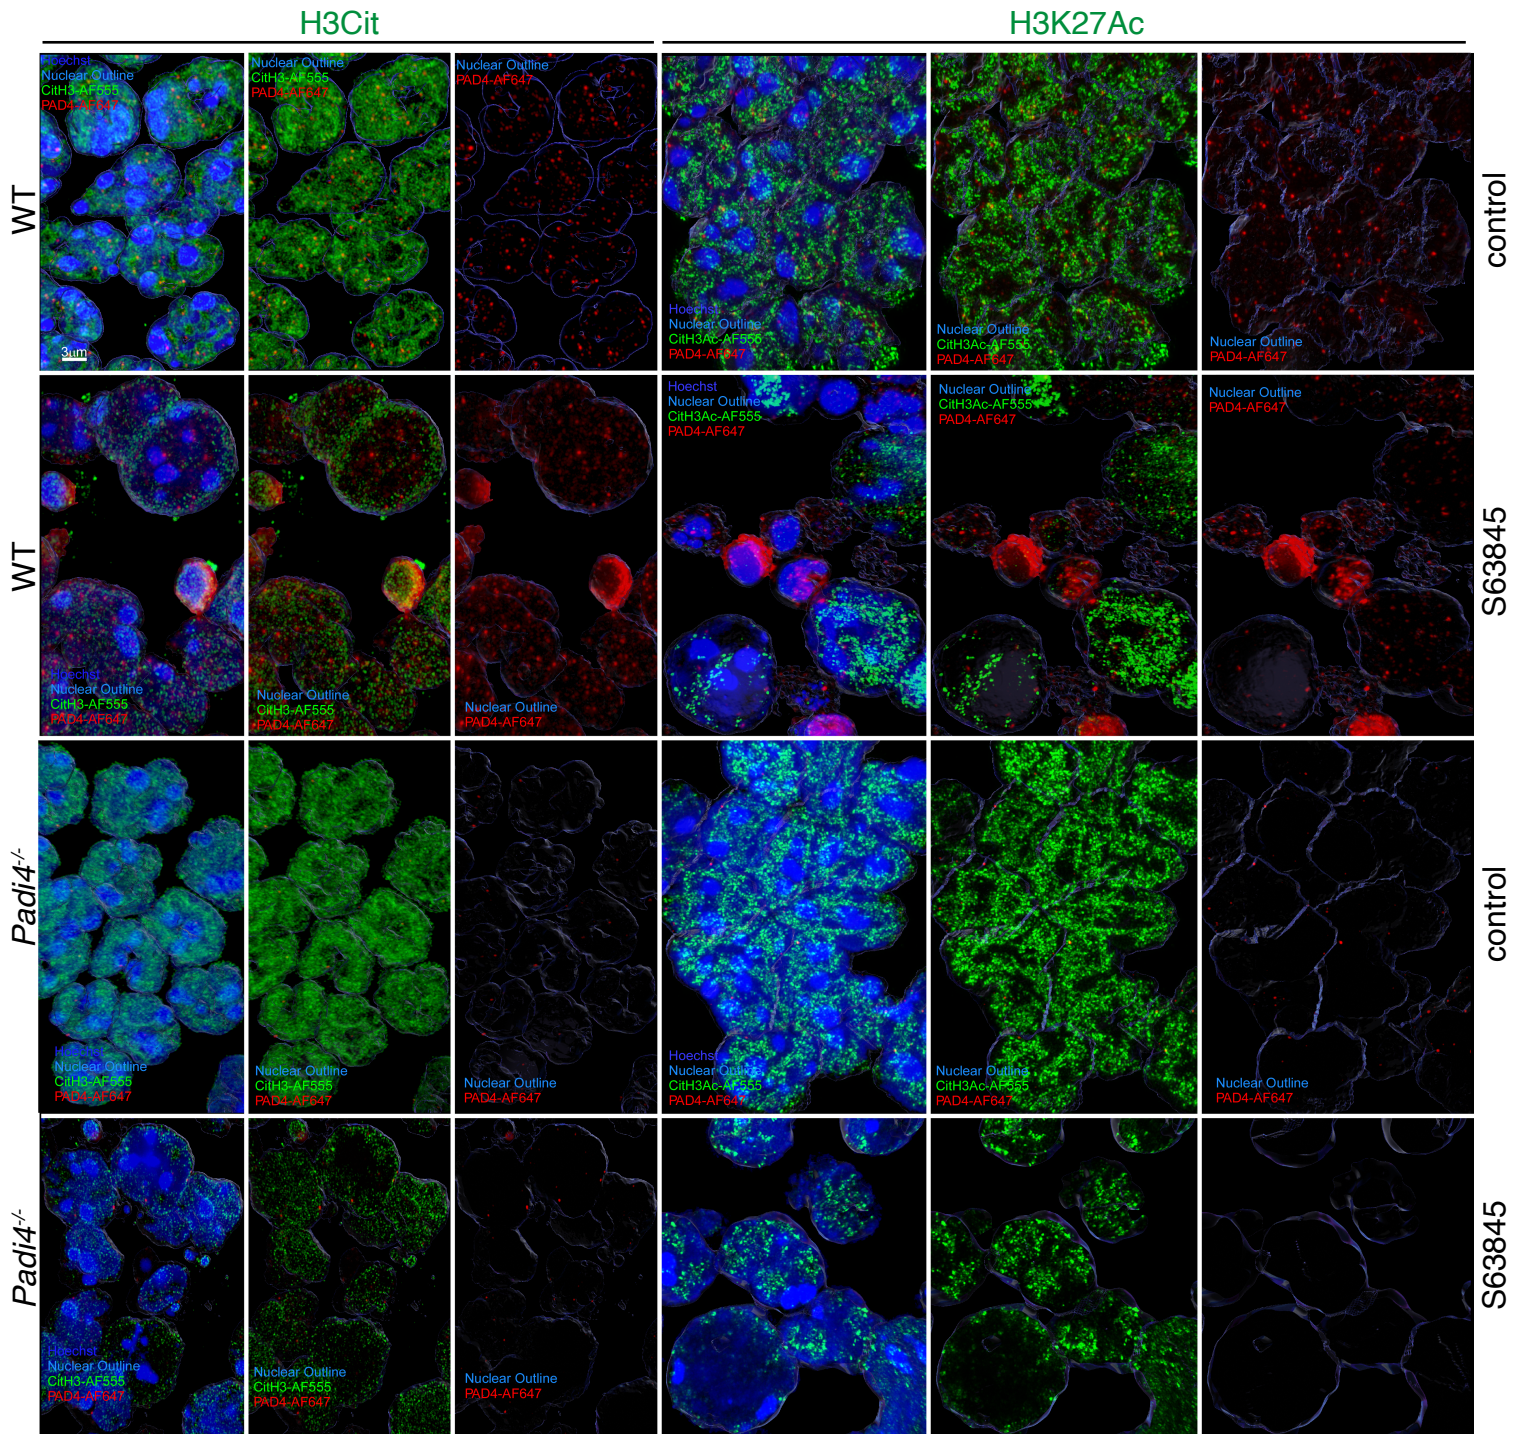

**Supplemental Figure 1. Airyscan confocal imaging of epigenetic changes to H3Cit and H3K27Ac during apoptotic cell death of neutrophils.** Bone marrow neutrophils were treated with S63845 (10µM) for 2.5h, then fixed, permeabilized, and stained with Hoechst or antibodies specific to H3Cit, H3K27Ac and Pad4.

**Supplemental Table 1.** Odds ratio for *Pad4*<sup>-/-</sup> entering the CTG<sup>+</sup>AnnV<sup>+</sup>PI<sup>-</sup> cytoplasm transition state per hour relative to WT within treatment groups

| <b>Treatment</b>                                  | <b>OR</b> | <b>95% CI*</b> | <b>P-Value*</b> |
|---------------------------------------------------|-----------|----------------|-----------------|
| <b>DMSO</b>                                       | 0.89      | 0.51,1.53      | 0.9687          |
| <b>PIK-75</b>                                     | 0.39      | 0.25,0.60      | <0.0001         |
| <b>IFN<math>\gamma</math>/birinapant/zVAD-fmk</b> | 0.50      | 0.33,0.76      | 0.0001          |

*Abbreviations: OR=odds ratio; CI=confidence interval; \*Sidak adjusted for multiple comparisons*

**Supplemental Table 2. Citrullinated proteins in apoptotic bone marrow neutrophils**

|                                                    |                                                                                                                                                                                                                                                                                        |                                                                                                                                                                                                                                                                                    |                                                                                                                                                                                                                                                                        |                                                                                                                                                                                                                                                         |                                                                                                                                                                                                                                                                 |                                                                                                                                                                                                                                                               |                                                                                                                                                                                                                                                                           |
|----------------------------------------------------|----------------------------------------------------------------------------------------------------------------------------------------------------------------------------------------------------------------------------------------------------------------------------------------|------------------------------------------------------------------------------------------------------------------------------------------------------------------------------------------------------------------------------------------------------------------------------------|------------------------------------------------------------------------------------------------------------------------------------------------------------------------------------------------------------------------------------------------------------------------|---------------------------------------------------------------------------------------------------------------------------------------------------------------------------------------------------------------------------------------------------------|-----------------------------------------------------------------------------------------------------------------------------------------------------------------------------------------------------------------------------------------------------------------|---------------------------------------------------------------------------------------------------------------------------------------------------------------------------------------------------------------------------------------------------------------|---------------------------------------------------------------------------------------------------------------------------------------------------------------------------------------------------------------------------------------------------------------------------|
| <b>Common to WT and <i>Padi4</i><sup>-/-</sup></b> | COHKE1 H2A1B<br>COHKE2 H2A1C<br>COHKE3 H2A1D<br>COHKE4 H2A1E<br>COHKE5 H2A1G<br>COHKE6 H2A1I<br>COHKE7 H2A1N<br>COHKE8 H2A1O<br>COHKE9 H2A1P<br>O08692 NGP<br>O08917 FLOT1<br>O35639 ANXA3<br>O35744 CHIL3<br>O70138 MMP8<br>O88569 ROA2<br>O89053 COR1A<br>P01027 CO3<br>P05064 ALDOA | P05213 TBA1B<br>P05555 ITAM<br>P07356 ANXA2<br>P07724 ALBU<br>P07901 HS90A<br>P08071 TRFL<br>P08103 HCK<br>P08752 GNAI2<br>P08905 LYZ2<br>P09103 PDIA1<br>P10107 ANXA1<br>P10126 EF1A1<br>P10853 H2B1F<br>P11247 PERM<br>P11499 HS90B<br>P11672 NGAL<br>P11835 ITB2<br>P13020 GELS | P14733 LMNB1<br>P15864 H12<br>P16858 G3P<br>P17182 ENOA<br>P17742 PPIA<br>P19973 LSP1<br>P20029 BIP<br>P20152 VIME<br>P21619 LMNB2<br>P24527 LKHA4<br>P26039 TLN1<br>P26040 EZRI<br>P26041 MOES<br>P27773 PDIA3<br>P28293 CATG<br>P29341 PABP1<br>P29351 PTN6          | P31725 S10A9<br>P35980 RL18<br>P40124 CAP1<br>P40142 TKT<br>P41245 MMP9<br>P43274 H14<br>P43275 H11<br>P43276 H15<br>P43277 H13<br>P47738 ALDH2<br>P47963 RL13<br>P49290 PERE<br>P51437 CAMP<br>P52480 KPYM<br>P56480 ATPB<br>P58252 EF2<br>P60710 ACTB | P62806 H4<br>P62962 PROF1<br>P62983 RS27A<br>P62996 TRA2B<br>P63017 HSP7C<br>P63101 I433Z<br>P63260 ACTG<br>P68372 TBB4B<br>P70333 HNRH2<br>P70460 VASP<br>P84228 H32<br>P99024 TBB5<br>Q01853 TERA<br>Q02053 UBA1<br>Q03265 ATPA<br>Q05144 RAC2<br>Q09014 NCF1 | Q3U9G9 LBR<br>Q3UP87 ELNE<br>Q60605 MYL6<br>Q61210 ARHG1<br>Q61233 PLSL<br>Q61646 HPT<br>Q61878 PRG2<br>Q62523 ZYX<br>Q64518 AT2A3<br>Q64727 VINC<br>Q6BCL1 PRAM<br>Q6WVG3 KCD12<br>Q8BFU2 H2A3<br>Q8BFZ3 ACTBL<br>Q8BJ54 SUN2<br>Q8BМК4 CKAP4<br>Q8BTM8 FLNA | Q8C166 CPNE1<br>Q8CB87 RAB44<br>Q8CGP1 H2B1K<br>Q8CGP6 H2A1H<br>Q8CGP7 H2A1K<br>Q8R258 CD177<br>Q8VDD5 MYH9<br>Q8VDL4 ADPGK<br>Q8VEK3 HNRPU<br>Q8VIJ6 SFPQ<br>Q91Y05 RPN1<br>Q99K48 NONO<br>Q9D0E1 HNRPM<br>Q9D154 ILEUA<br>Q9ERD7 TBB3<br>Q9Z2X1 HNRPF<br>D3Z2H9 TPM3R57 |
| <b>WT only</b>                                     | E9Q7G0 NUMA1<br>O35737 HNRH1<br>O54824 IL16<br>O88342 WDR1<br>P04104 K2C1<br>P06151 LDHA<br>P06745 GGPI<br>P09411 PGK1<br>POCW03 LY6C2<br>P11087 CO1A1<br>P14685 PSMD3<br>P14824 ANXA6<br>P17156 HSP72<br>P18760 COF1<br>P25911 LYN<br>P26043 RADI<br>P26443 DHE3                      | P28650 PURA1<br>P30681 HMGB2<br>P37040 NCPR<br>P42225 STAT1<br>P47911 RL6<br>P48025 KSYK<br>P49312 ROA1<br>P49710 HCLS1<br>P54116 STOM<br>P57780 ACTN4<br>P60766 CDC42<br>P60843 IF4A1<br>P62242 RS8<br>P62264 RS14<br>P62754 RS6<br>P62918 RL8<br>P63038 CH60                     | P63158 HMGB1<br>P68033 ACTC<br>P68134 ACTS<br>P68368 TBA4A<br>P70248 MYO1F<br>P84096 RHOG<br>P97384 ANX11<br>P97425 ECP2<br>P97426 ECP1<br>Q00612 G6PD1<br>Q00P19 HNRL2<br>Q01149 CO1A2<br>Q03347 RUNX1<br>Q3TEA8 HP1B3<br>Q3TRM8 HXK3<br>Q3U7R1 ESYT1<br>Q4QRL3 CC88B | Q505F5 LRC47<br>Q55UA5 MYO1G<br>Q60634 FLOT2<br>Q61033 LAP2A<br>Q61093 CY24B<br>Q61598 GDIIB<br>Q61599 GDIR2<br>Q61656 DDX5<br>Q61753 SERA<br>Q61792 LASP1<br>Q61881 MCM7<br>Q62261 SPTB2<br>Q63844 MKO3<br>Q64478 H2B1H<br>Q68F05 CLH1<br>Q6IRU2 TPM4  | Q6ZWY9 H2B1C<br>Q76MZ3 2AAA<br>Q7TPR4 ACTN1<br>Q8BG05 ROA3<br>Q8BK67 RCC2<br>Q8BP47 SYNC<br>Q8BP67 RL24<br>Q8BPU7 ELMO1<br>Q8BT60 CPNE3<br>Q8BZQ2 CRLD2<br>Q8C2K1 DEFI6<br>Q8CIH5 PLCG2<br>Q8K1B8 URP2<br>Q8R081 HNRPL<br>Q8R5A3 AB11P<br>Q8VC10 PLBL1          | Q8VDW0 DX39A<br>Q91V41 RAB14<br>Q91VC3 IF4A3<br>Q91V17 RINI<br>Q91V14 STRK38<br>Q92111 TRFE<br>Q922B2 SYDC<br>Q93092 TALDO<br>Q99JY9 ARP3<br>Q9CQ16 COTL1<br>Q9CQV8 1433B<br>Q9CW03 SMC3<br>Q9D1D4 TMEDA<br>Q9D2V7 CORO7<br>Q9D6Y7 MSRA<br>Q9D8N0 EF1G        | Q9DBJ1 PGAM1<br>Q9DCD0 6PGD<br>Q9ET01 PYGL<br>Q9JHK5 PLEK<br>Q9JIF7 COPB<br>Q9JFK1 IQGA1<br>Q9JL26 FMNL1<br>Q9JLV6 PNKP<br>Q9QYB5 ADDG<br>Q9QYCO ADDA<br>Q9WUM3 COR1B<br>Q9WV32 ARC1B<br>Q9Z183 PADI4<br>Q9Z1N5 DX39B<br>A0A0N4SVP8 EIF4A3L2<br>Q3UJB0 SF3B2              |
| <b><i>Padi4</i><sup>-/-</sup> only</b>             | POCG49 UBB<br>POCG50 UBC<br>P14234 FGR<br>P19783 COX41                                                                                                                                                                                                                                 | P21107 TPM3<br>P28481 CO2A1<br>P48678 LMNA                                                                                                                                                                                                                                         | P62984 RL40<br>P68369 TBA1A<br>P68373 TBA1C                                                                                                                                                                                                                            | P68433 H31<br>Q3TTY5 K22E<br>Q3U0V1 FUBP2                                                                                                                                                                                                               | Q3UZZ4 OLFM4<br>Q62167 DDX3X<br>Q64475 H2B1B                                                                                                                                                                                                                    | Q6PDM2 SRF1<br>Q8K426 RETNG<br>Q8VED5 K2C79                                                                                                                                                                                                                   | Q9CY58 PAIRB<br>Q9DC51 GNAI3<br>A0A0A6YW67 GM8797                                                                                                                                                                                                                         |

Proteins displayed with coverage>10% and >5 peptides

**Supplemental Table 3. Citrullinated proteins in resting bone marrow neutrophils**

| Common to WT and <i>Padi4</i> <sup>-/-</sup> |              |              |               |               |               |                    |  |  |
|----------------------------------------------|--------------|--------------|---------------|---------------|---------------|--------------------|--|--|
| B2RXR6 ANR44                                 | P11352 GPX1  | P29351 PTN6  | P62281 RS11   | Q3U9G9 LBR    | Q8BG05 ROA3   | Q9CQ16 COTL1       |  |  |
| D326Q9 BIN2                                  | P11499 HS90B | P29391 FRIL1 | P62754 RS6    | Q3UP87 ELNE   | Q8BHD7 PTBP3  | Q9CQV8 1433B       |  |  |
| E9PVX6 KI67                                  | P11672 NGAL  | P31725 S10A9 | P62806 H4     | Q4QLR3 CC88B  | Q8BJS4 SUN2   | Q9CU62 SMC1A       |  |  |
| O08692 NGP                                   | P11835 ITB2  | P35550 FBRL  | P62814 VATB2  | Q50116 DDX17  | Q8BMK4 CKAP4  | Q9CVB6 ARPC2       |  |  |
| O08917 FLOT1                                 | P13020 GELS  | P35980 RL18  | P62918 RL8    | Q505F5 LRC47  | Q8BP47 SYNC   | Q9D0E1 HNRRPM      |  |  |
| O35639 ANXA3                                 | P14148 RL7   | P38647 GRP75 | P62962 PROF1  | Q60605 MYL6   | Q8BPU7 ELMO1  | Q9D154 ILEUA       |  |  |
| O35744 CHIL3                                 | P14211 CALR  | P40124 CAP1  | P62983 RS27A  | Q60668 HNRPD  | Q8BT60 CPNE3  | Q9D1D4 TMEDA       |  |  |
| O54824 IL16                                  | P14234 FGR   | P40142 TKT   | P62996 TRA2B  | Q60864 STIP1  | Q8BMT8 FLNA   | Q9D2V7 CORO7       |  |  |
| O70138 IMMP8                                 | P14733 LMNB1 | P41245 MMMP9 | P63001 RAC1   | Q61033 LAP2A  | Q8BUM3 PTN7   | Q9D6V7 MSRA        |  |  |
| O70145 TNCF2                                 | P15864 H12   | P43274 H14   | P63017 HSP7C  | Q61081 CDC37  | Q8BZQ2 CRLD2  | Q9D8N0 EF1G        |  |  |
| O88342 WDR1                                  | P16110 LEG3  | P43275 H11   | P63101 1433Z  | Q61093 CY24B  | Q8C166 CPNE1  | Q9DBJ1 PGAM1       |  |  |
| O88569 ROA2                                  | P16546 SPTN1 | P43276 H15   | P63260 ACTG   | Q61096 PRTN3  | Q8CB87 RAB44  | Q9DCC51 GNAI3      |  |  |
| O88844 IDHC                                  | P16858 G3P   | P43277 H13   | P68033 ACTC   | Q61210 ARHG1  | Q8CGP1 H2B1K  | Q9DCD01 6P6D       |  |  |
| O89053 COR1A                                 | P17182 ENOA  | P47738 ALDH2 | P68254 1433T  | Q61233 PLSL   | Q8CIE6 COPA   | Q9ET01 PYGL        |  |  |
| P01027 CO3                                   | P17742 PPIA  | P47753 CAZA1 | P68368 TBA4A  | Q61598 GDIB   | Q8K1B8 URP2   | Q9JJ28 FLII        |  |  |
| P01942 HBA                                   | P17751 TPIS  | P47754 CAZA2 | P68369 TBA1A  | Q61599 GDIR2  | Q8K426 RETNG  | Q9J1K1 IQGAI       |  |  |
| P03958 ADA                                   | P18653 KS6A1 | P47757 CAPZB | P68372 TBB4B  | Q61646 HPT    | Q8K4Z5 SF3A1  | Q9JKY5 HIP1R       |  |  |
| P05064 ALDOA                                 | P18760 COF1  | P47791 GSHR  | P68373 TBA1C  | Q61656 DDX5   | Q8R081 HNRRP  | Q9JL26 FMNL1       |  |  |
| P05213 TBA1B                                 | P19973 LSP1  | P47915 RL29  | P70302 STIM1  | Q61753 SERA   | Q8R258 CDL177 | Q9JLV6 PNKP        |  |  |
| P05555 ITAM                                  | P20029 BIP   | P47962 RL5   | P70460 VASP   | Q61768 KINH   | Q8VBT6 APOBR  | Q9QUI0 RHOA        |  |  |
| P06151 LDHA                                  | P20060 HEXB  | P47963 RL13  | P80315 TCPD   | Q61792 LASP1  | Q8VDD5 MYH9   | Q9QX51 PLEC        |  |  |
| P06745 G6PI                                  | P20152 VIME  | P48025 KSYK  | P80318 TCPG   | Q61878 PRG2   | Q8VDL4 ADPGK  | Q9QYCO ALDDA       |  |  |
| P07356 ANXA2                                 | P21107 TPM3  | P49290 PERE  | P84096 RHOG   | Q61881 MCM7   | Q8VDP3 MICA1  | Q9R0P5 DEST        |  |  |
| P07724 ALBU                                  | P21460 CYTC  | P49312 ROA1  | P84228 H32    | Q62167 DDX3X  | Q8VEK3 HNRRP  | Q9R111 GUAD        |  |  |
| P07901 HS90A                                 | P21619 LMNB2 | P49710 HCL51 | P97369 NCF2   | Q62261 SPTB2  | Q8VIJ6 SFPQ   | Q9R190 MTA2        |  |  |
| P08071 TRFL                                  | P24452 CAPG  | P50580 PA2G4 | P97384 ANX11  | Q62418 DBNL   | Q91V41 RAB14  | Q9R1P4 PSA1        |  |  |
| P08113 ENPL                                  | P24527 LKH4A | P51437 CAMP  | P97425 ECP2   | Q62422 OSTF1  | Q91VC3 IF4A3  | Q9WTM5 RUVB2       |  |  |
| P08249 MDHM                                  | P25911 LYN   | P52480 KPYM  | P99024 TBB5   | Q63844 MK03   | Q91V17 RINI   | Q9WU78 PDC6I       |  |  |
| P08752 GNAI2                                 | P26039 TLN1  | P56480 ATPB  | P99029 PRDX5  | Q64518 AT2A3  | Q91VM5 RMXL1  | Q9WUM3 COR1B       |  |  |
| P08905 LYZ2                                  | P26040 EZRI  | P57780 ACTN4 | Q00612 G6PD1  | Q64727 VINC   | Q91YQ5 IRPN1  | Q9WV32 ARC1B       |  |  |
| P09103 PDIA1                                 | P26041 MOES  | P58252 EF2   | Q00P19 HNRL2  | Q68FD5 CLH1   | Q92111 TRFE   | Q9Z0N1 IF2G        |  |  |
| P09405 NUCL                                  | P26043 RADI  | P59999 ARPC4 | Q01853 TERA   | Q6BCL1 PRAM   | Q921M7 CYRIB  | Q9Z1N5 DX39B       |  |  |
| P09411 PGK1                                  | P26443 DHE3  | P60766 CDC42 | Q02053 UBA1   | Q6G557 H2A2A  | Q922B2 SYDC   | Q9Z1O9 SYVC        |  |  |
| P10107 ANXA1                                 | P27005 S10A8 | P60843 IF4A1 | Q03265 ATPA   | Q6PIC6 AT1A3  | Q93092 TALDO  | Q9Z2X1 HNRRPF      |  |  |
| P10126 EF1A1                                 | P27546 MAP4  | P61161 ARP2  | Q05144 RAC2   | Q6WVVG3 KCD12 | Q99JY9 ARP3   | A0A0N4SVP8 EIFA3L2 |  |  |
| P10630 IF4A2                                 | P27773 PDIA3 | P61979 HNRPK | Q05512 MARK2  | Q6ZWR6 SYNE1  | Q99K48 NONO   | B2RV77 CSTD4C      |  |  |
| P10649 GSTM1                                 | P28293 CATG  | P61982 1433G | Q09014 NCF1   | Q76MZ3 2AAA   | Q99K10 ACON   | D3Z2H9 TPM3R57     |  |  |
| P10853 H2B1F                                 | P28650 PURA1 | P62242 RS8   | Q3TEA8 HP1B3  | Q7TPR4 ACTN1  | Q99PT1 GDIR1  | Q9Z317 EAR6        |  |  |
| P11247 PERM                                  | P29341 PABP1 | P62259 1433E | Q3U0V1 FUBP2  | Q8BFZ3 ACTBL  |               |                    |  |  |
| WT only                                      |              |              |               |               |               |                    |  |  |
| COHKE1 H2A1B                                 | P09602 HMG2  | P47856 GFPT1 | P70248 MYO1F  | Q8BFU2 H2A3   | Q8VDW0 DX39A  | Q9DBG6 RPN2        |  |  |
| COHKE2 H2A1C                                 | P11087 CO1A1 | P47911 RL6   | P80314 TCPB   | Q8BHN3 GANAB  | Q8VED5 K2C79  | Q9DBS1 TMM43       |  |  |
| COHKE3 H2A1D                                 | P11983 TCPA  | P48999 LOX5  | P97426 ECP1   | Q8BK67 RC2C   | Q91V92 ACLY   | Q9EQ06 DHB11       |  |  |
| COHKE4 H2A1E                                 | P12265 BGLR  | P49718 MCM5  | Q00519 XDH    | Q8BML9 SVQ    | Q922P9 GLYR1  | Q9ERD7 TBB3        |  |  |
| COHKE5 H2A1G                                 | P12382 PFKAL | P50396 GDIA  | Q11011 PSA    | Q8BP67 RL24   | Q92254 PDE2A  | Q9JHK5 PLEK        |  |  |
| COHKE6 H2A1I                                 | P14131 RS16  | P50516 VATA  | Q3TRM8 HXK3   | Q8C147 DOCK8  | Q99J77 SIAS   | Q9J111 STK4        |  |  |
| COHKE7 H2A1N                                 | P14685 PSMD3 | P51150 RAB7A | Q3U7R1 EYTY1  | Q8U7R1 DOCK2  | Q99J16 RAP1B  | Q9J1F7 COPB        |  |  |
| COHKE8 H2A1O                                 | P23492 PNPH  | P51881 ADT2  | Q3UW53 NIBA1  | Q8CAQ8 MIC60  | Q99KC8 VMA5A  | Q9J1M7 ARPC3       |  |  |
| COHKE9 H2A1P                                 | P24547 IMDH2 | P53810 PIPNA | Q3UZ24 OLFMA4 | Q8CGC7 SYEP   | Q99KN9 EPN4   | Q9QUG9 GRP2        |  |  |
| O08749 DLDH                                  | P27659 RL3   | P55258 RAB8A | Q5FWK3 RHG01  | Q8CGP5 H2A1F  | Q99MK8 ARBK1  | Q9QUM9 PSA6        |  |  |
| O09159 MA2B1                                 | P27661 H2AX  | P61358 RL27  | Q5SUA5 MYO1G  | Q8CGP6 H2A1H  | Q9CQ60 6PGL   | Q9QY85 ADDG        |  |  |
| O09167 RL21                                  | P30681 HMGB2 | P62702 RS4X  | Q60710 SAMH1  | Q8CIH5 PLCG2  | Q9CWJ9 PUR9   | Q9QZ08 H2AY        |  |  |
| O35350 CAN1                                  | P32037 GTR3  | P62821 RAB1A | Q61362 CH3L1  | Q8JZQ9 EIF3B  | Q9CZ13 QCR1   | Q9R112 SQOR        |  |  |
| O55029 COPB2                                 | P32067 LA    | P62827 RAN   | Q62230 SN     | Q8K310 MATR3  | Q9D0F9 PGM1   | Q9WVK4 EHD1        |  |  |
| O55222 ILK                                   | P35278 RAB5C | P62911 RL32  | Q62465 VAT1   | Q8R146 APEH   | Q9D1G1 RAB1B  | Q9Z0P5 TWF2        |  |  |
| O89086 RBM3                                  | P37040 NCP1  | P63158 HMGB1 | Q64521 GPD1M  | Q8VC10 PLBL1  | Q9D6V9 GLG8   | Q9Z183 PAD14       |  |  |
| P06800 PTPRC                                 | P39654 LOX15 | P63242 IF5A1 | Q78PY7 SND1   | Q8VCT3 AMPB   | Q9D8E6 RL4    | Q9Z1E4 GYS1        |  |  |
| P08103 HCK                                   | P46471 PRS7  | P68040 RACK1 | Q7TNG5 EMAL2  | Q8VDM4 PSMD2  | Q9D8Y0 EFHD2  | Q6PHQ9 PABPC4      |  |  |
| P09528 FRIH                                  | P47809 MP2K4 | P68510 1433F |               |               |               |                    |  |  |
| <i>Padi4</i> <sup>-/-</sup> only             |              |              |               |               |               |                    |  |  |
| E9Q7G0 NUMA1                                 | P15532 NDKA  | P60335 PCBP1 | Q01768 NDKB   | Q6PGG2 GMIP   | Q91Y14 ARRB2  | Q9CZM2 RL15        |  |  |
| F6ZDS4 TPR                                   | P16125 LDHB  | P62137 PP1A  | Q3B7Z2 OSBP1  | Q8BVK9 SP110  | Q91YR9 PTGR1  | Q9D7N9 APMAP       |  |  |
| O08709 PRDX6                                 | P19783 COX41 | P62141 PP1B  | Q3TTY5 K22E   | Q8C2K1 DEFI6  | Q921G6 LRCH4  | Q9DB77 QCR2        |  |  |
| O35737 HNRRH1                                | P22437 PGH1  | P62264 RS14  | Q5XJY5 COPD   | Q8CBW3 ABI1   | Q922D8 C1TC   | Q9DBR7 MYPT1       |  |  |
| O54988 SLK                                   | P23198 CBX3  | P62880 GBB2  | Q61166 MARE1  | Q8CHY6 P66A   | Q99K6P PRP19  | Q9JJ22 TBA8        |  |  |
| O55023 HMPA1                                 | P36371 TAP2  | P63085 MK01  | Q61316 HSP74  | Q8CI51 PDLI5  | Q99LX0 PARK7  | Q9R062 GLYG        |  |  |
| O55131 SEPT7                                 | P42232 STA5B | P63268 ACTH  | Q61462 CY24A  | Q8CIN4 PAK2   | Q9CQN1 TRAP1  | Q9WUK2 IF4H        |  |  |
| O55143 AT2A2                                 | P42932 TCPQ  | P68134 ACTS  | Q61990 PCBP2  | Q8R1Q8 DC1L1  | Q9CW03 SMC3   | Q9WVA4 TAGL2       |  |  |
| P04104 K2C1                                  | P48678 LMNA  | P68433 H31   | Q62318 TIF1B  | Q8VDM6 HNRL1  | Q9CV58 PAIRB  | E9PV04 EIF4A3L1    |  |  |
| POCW03 LY6C2                                 | P54823 DDX6  | P70315 WASP  | Q62523 ZYX    | Q8VDN2 AT1A1  | Q9CZ44 NSF1C  | Q80UR4 PRSS34      |  |  |
| P14152 MDHC                                  | P58058 NADK  | P97351 RS3A  | Q61RU2 TPM4   | Q8VI36 PAXI   |               |                    |  |  |

Proteins displayed with coverage>10% and >5 peptides

**Supplemental Table 4. Citrullinated proteins in apoptotic bone marrow neutrophils fall into diverse pathways**

| Pathway name                                                                          | Entities |          |          |
|---------------------------------------------------------------------------------------|----------|----------|----------|
|                                                                                       | #        | p        | FDR      |
| <b>Common to WT and <i>Pad4</i><sup>-/-</sup></b>                                     |          |          |          |
| Neutrophil degranulation                                                              | 38       | 1.11E-16 | 4.04E-14 |
| PRC2 methylates histones and DNA                                                      | 15       | 1.11E-16 | 4.04E-14 |
| Metalloprotease DUBs                                                                  | 13       | 2.55E-15 | 6.18E-13 |
| Condensation of Prophase Chromosomes                                                  | 14       | 8.88E-15 | 1.62E-12 |
| Deposition of new CENPA-containing nucleosomes at the centromere                      | 14       | 4.59E-14 | 5.55E-12 |
| Nucleosome assembly                                                                   | 14       | 4.59E-14 | 5.55E-12 |
| RUNX1 regulates genes involved in megakaryocyte differentiation and platelet function | 15       | 9.74E-14 | 1.01E-11 |
| RMTs methylate histone arginines                                                      | 14       | 1.31E-13 | 1.20E-11 |
| Mitotic Prophase                                                                      | 15       | 9.69E-12 | 7.75E-10 |
| Innate Immune System                                                                  | 45       | 1.29E-11 | 9.32E-10 |
| UCH proteinases                                                                       | 14       | 4.05E-11 | 2.67E-09 |
| Epigenetic regulation of gene expression                                              | 16       | 1.40E-10 | 8.42E-09 |
| Chromosome Maintenance                                                                | 14       | 2.95E-10 | 1.65E-08 |
| Chromatin modifying enzymes                                                           | 16       | 1.35E-09 | 6.49E-08 |
| Chromatin organization                                                                | 16       | 1.35E-09 | 6.49E-08 |
| M Phase                                                                               | 22       | 3.41E-09 | 1.54E-07 |
| Immune System                                                                         | 52       | 6.83E-09 | 2.87E-07 |
| Transcriptional regulation by RUNX1                                                   | 16       | 9.68E-08 | 3.87E-06 |
| Ub-specific processing proteases                                                      | 13       | 9.50E-07 | 3.61E-05 |
| Cell Cycle, Mitotic                                                                   | 23       | 1.50E-06 | 5.39E-05 |
| Signaling by Rho GTPases                                                              | 23       | 3.28E-06 | 1.12E-04 |
| Deubiquitination                                                                      | 15       | 4.64E-06 | 1.44E-04 |
| Signaling by Rho GTPases, Miro GTPases and RHOBTB3                                    | 23       | 4.66E-06 | 1.44E-04 |
| Cell Cycle                                                                            | 24       | 5.34E-06 | 1.60E-04 |
| Programmed Cell Death                                                                 | 12       | 8.82E-06 | 2.56E-04 |
| <b>WT only</b>                                                                        |          |          |          |
| Platelet activation, signaling and aggregation                                        | 16       | 1.36E-07 | 9.59E-05 |
| Signaling by Rho GTPases                                                              | 25       | 3.41E-07 | 1.17E-04 |
| Signaling by Rho GTPases, Miro GTPases and RHOBTB3                                    | 25       | 4.99E-07 | 1.17E-04 |
| RHO GTPase cycle                                                                      | 18       | 2.24E-06 | 3.95E-04 |

No pathways were identified from *Pad4*<sup>-/-</sup> neutrophil samples. FDR<0.001, pathways included >10 proteins

**Supplemental Table 5. Citrullinated proteins in resting bone marrow neutrophils fall into diverse pathways**

| Pathway name                                                                          | Entities |          |          |
|---------------------------------------------------------------------------------------|----------|----------|----------|
|                                                                                       | #        | p        | FDR      |
| <b>Common to WT and <i>Pad4</i><sup>-/-</sup></b>                                     |          |          |          |
| Innate Immune System                                                                  | 89       | 1.11E-16 | 5.65E-14 |
| Neutrophil degranulation                                                              | 66       | 1.11E-16 | 5.65E-14 |
| Signaling by Rho GTPases                                                              | 58       | 2.22E-16 | 7.53E-14 |
| Immune System                                                                         | 108      | 5.55E-16 | 1.13E-13 |
| Signaling by Rho GTPases, Miro GTPases and RHOBTB3                                    | 58       | 5.55E-16 | 1.13E-13 |
| RHO GTPase Effectors                                                                  | 36       | 1.78E-15 | 3.00E-13 |
| RHO GTPase cycle                                                                      | 35       | 1.05E-08 | 1.53E-06 |
| Programmed Cell Death                                                                 | 22       | 2.01E-08 | 2.55E-06 |
| HSP90 chaperone cycle for steroid hormone receptors (SHR) in the presence of ligand   | 12       | 3.32E-08 | 3.75E-06 |
| Axon guidance                                                                         | 29       | 1.16E-07 | 1.03E-05 |
| Nervous system development                                                            | 29       | 1.22E-07 | 1.03E-05 |
| Platelet activation, signaling and aggregation                                        | 25       | 1.81E-07 | 1.30E-05 |
| Hemostasis                                                                            | 42       | 2.02E-07 | 1.35E-05 |
| Cellular responses to stress                                                          | 38       | 2.99E-07 | 1.88E-05 |
| Cellular responses to stimuli                                                         | 38       | 3.41E-07 | 2.01E-05 |
| EPHB-mediated forward signaling                                                       | 10       | 4.36E-07 | 2.44E-05 |
| L1CAM interactions                                                                    | 14       | 6.29E-07 | 3.33E-05 |
| Apoptosis                                                                             | 16       | 1.33E-06 | 6.65E-05 |
| Apoptotic execution phase                                                             | 10       | 1.20E-05 | 4.56E-04 |
| Recycling pathway of L1                                                               | 10       | 1.23E-05 | 4.56E-04 |
| L13a-mediated translational silencing of Ceruloplasmin expression                     | 13       | 1.45E-05 | 5.04E-04 |
| EPH-Ephrin signaling                                                                  | 11       | 1.52E-05 | 5.04E-04 |
| COPI-mediated anterograde transport                                                   | 12       | 1.80E-05 | 5.22E-04 |
| Nonsense-Mediated Decay (NMD)                                                         | 12       | 2.98E-05 | 8.04E-04 |
| Nonsense Mediated Decay (NMD) enhanced by the Exon Junction Complex (EJC)             | 12       | 2.98E-05 | 8.04E-04 |
| <b>WT only</b>                                                                        |          |          |          |
| Metalloprotease DUBs                                                                  | 12       | 1.75E-13 | 9.73E-11 |
| Condensation of Prophase Chromosomes                                                  | 12       | 4.88E-13 | 1.04E-10 |
| UCH proteinases                                                                       | 16       | 5.64E-13 | 1.04E-10 |
| PRC2 methylates histones and DNA                                                      | 12       | 3.27E-12 | 4.55E-10 |
| Mitotic Prophase                                                                      | 14       | 2.47E-11 | 2.74E-09 |
| Nucleosome assembly                                                                   | 12       | 3.98E-11 | 3.14E-09 |
| Deposition of new CENPA-containing nucleosomes at the centromere                      | 12       | 3.98E-11 | 3.14E-09 |
| RMTs methylate histone arginines                                                      | 12       | 9.70E-11 | 6.69E-09 |
| Neutrophil degranulation                                                              | 28       | 4.16E-10 | 2.54E-08 |
| RUNX1 regulates genes involved in megakaryocyte differentiation and platelet function | 12       | 8.37E-10 | 4.60E-08 |
| Ub-specific processing proteases                                                      | 16       | 7.05E-09 | 3.52E-07 |
| M Phase                                                                               | 21       | 1.17E-08 | 5.38E-07 |
| Chromosome Maintenance                                                                | 12       | 6.42E-08 | 2.69E-06 |
| Transcriptional regulation by RUNX1                                                   | 16       | 2.38E-07 | 9.27E-06 |
| Formation of a pool of free 40S subunits                                              | 10       | 9.04E-07 | 3.34E-05 |
| Cell Cycle, Mitotic                                                                   | 23       | 1.34E-06 | 4.29E-05 |
| Epigenetic regulation of gene expression                                              | 12       | 1.34E-06 | 4.29E-05 |
| L13a-mediated translational silencing of Ceruloplasmin expression                     | 10       | 2.10E-06 | 6.31E-05 |
| Deubiquitination                                                                      | 16       | 2.25E-06 | 6.52E-05 |
| GTP hydrolysis and joining of the 60S ribosomal subunit                               | 10       | 2.88E-06 | 7.77E-05 |
| Eukaryotic Translation Initiation                                                     | 10       | 5.19E-06 | 1.06E-04 |
| Cap-dependent Translation Initiation                                                  | 10       | 5.19E-06 | 1.06E-04 |
| Cell Cycle                                                                            | 24       | 5.31E-06 | 1.06E-04 |
| Chromatin organization                                                                | 13       | 5.32E-06 | 1.06E-04 |
| Chromatin modifying enzymes                                                           | 13       | 5.32E-06 | 1.06E-04 |
| Innate Immune System                                                                  | 34       | 3.18E-05 | 5.72E-04 |

No pathways were identified from *Pad4*<sup>-/-</sup> neutrophil samples. FDR<0.001, pathways included >10 proteins

**Supplemental Video 1. Super-resolution lattice SIM microscopy of H3Cit distribution in neutrophils.** WT and *Padi4*<sup>-/-</sup> neutrophils were fixed, permeabilized, and stained with a H3Cit antibody. A 3D reconstruction of z-stacks is shown.
